# Supplementary material for: Terpenoid Emissions of Two Mediterranean Woody Species in Response to Drought Stress
Source: PubMed Central journal article supplement (PMC6064746; doi:10.3389/fpls.2018.01071), 2018-07-23

*Supplementary Material*

**Terpenoid emissions of two Mediterranean woody species in response to drought stress**

Simon Haberstroh<sup>1,2\*</sup>, Jürgen Kreuzwieser<sup>1</sup>, Raquel Lobo-do-Vale<sup>2</sup>, Maria C. Caldeira<sup>2</sup>, Maren Dubbert<sup>1</sup>, Christiane Werner<sup>1</sup>

<sup>1</sup> Ecosystem Physiology, University Freiburg, Freiburg, Germany

<sup>2</sup> Centro de Estudos Florestais, Instituto Superior de Agronomia, Universidade de Lisboa, Lisboa, Portugal

\* **Correspondence:**

Corresponding Author

[simon.haberstroh@cep.uni-freiburg.de](mailto:simon.haberstroh@cep.uni-freiburg.de)

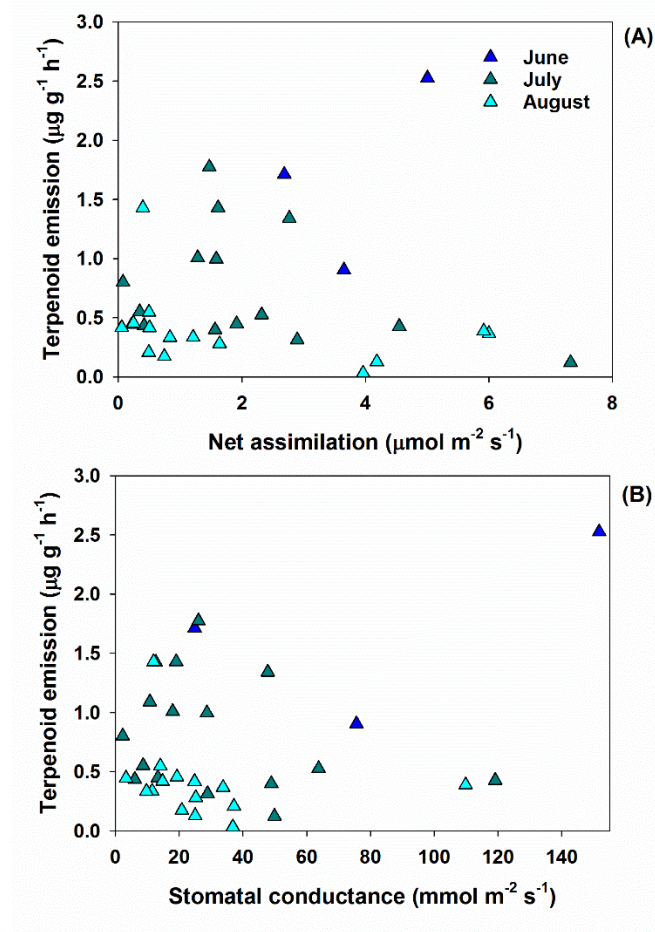

**Supplementary Figure 1.** Relationship of measured terpenoid emissions to net assimilation rate (A) and stomatal conductance (B) for *C. ladanifer*.

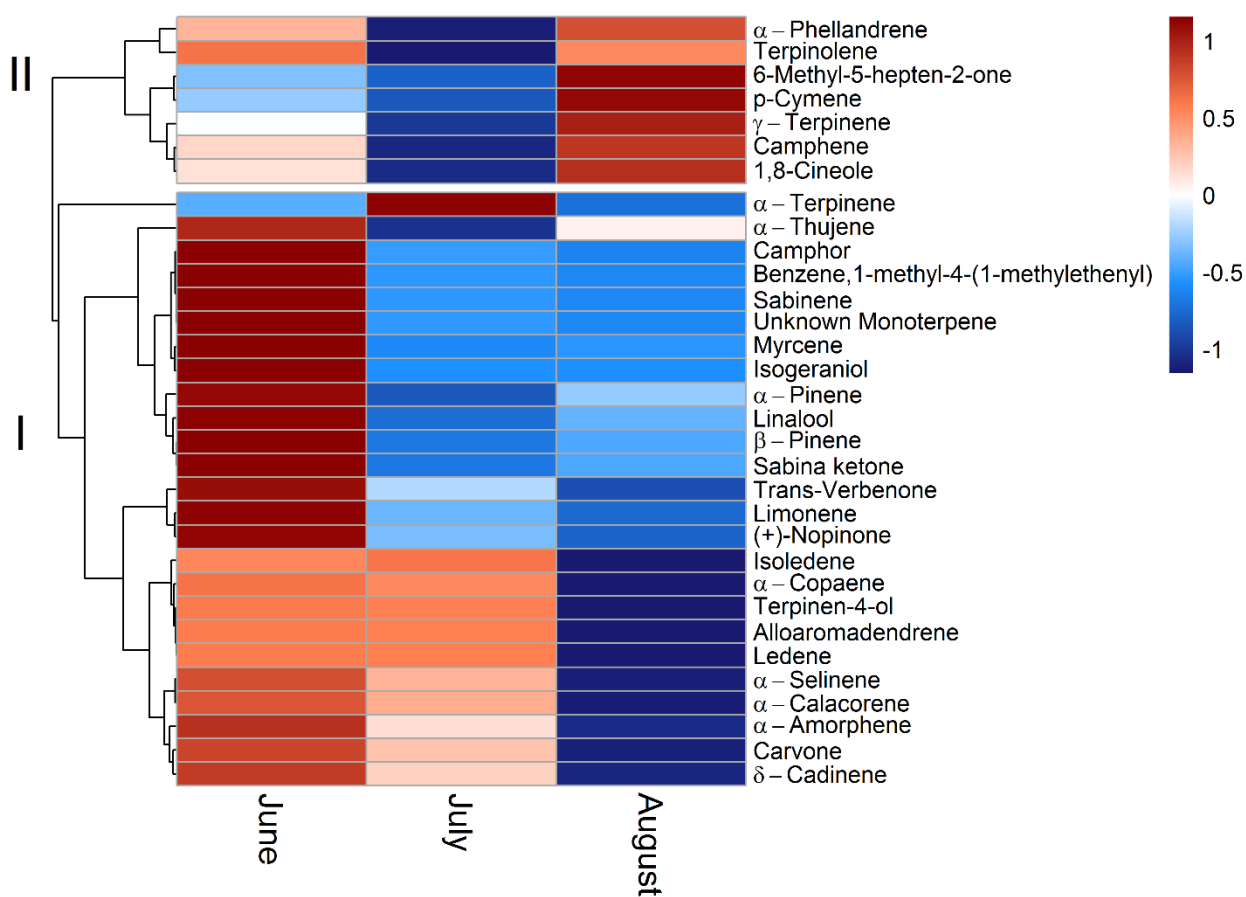

**Supplementary Figure 2.** Relative change of single terpenoid compound emissions over time for *Q. suber* illustrated as clustered heat maps. Emissions are measured emission rates. The colour code indicates the relative changes of emissions over time. Red colours indicate increasing emission rates on a scale from 0 to 1; where a colour code of 0 corresponds to unaffected emission rates and a colour code of 1 corresponds to strongly increased emission rates. Blue colours indicate decreasing emission rates on a scale from 0 to -1, where a colour code of 0 corresponds to unaffected emission rates and a colour code of -1 corresponds to strongly decreased emission rates.

**Supplementary Table 1.** Standard emission factor  $E_s$  ( $\mu\text{g C g}^{-1} \text{h}^{-1}$ ) with 95 % confidence interval and empirical temperature coefficient  $\beta$  ( $^{\circ}\text{C}^{-1}$ ) with 95 % confidence interval, match factor (MF) and retention index (RI) of all emitted terpenoid compounds for *Q. suber* ( $n = 18$  for June,  $n = 32$  for July and August).  $E_s$  and  $\beta$  were calculated according to Guenther et al. (1993), where  $E_s$  is the y-intercept and  $\beta$  the slope of the regression.

| Compound                | Month  | $E_s$                                         | $\beta$            | MF   | RI  |
|-------------------------|--------|-----------------------------------------------|--------------------|------|-----|
| $\alpha$ -Thujene       | June   | $9.98 \times 10^{-3} \pm 9.21 \times 10^{-3}$ | $-0.125 \pm 0.090$ | 97.5 | 931 |
|                         | July   | $2.96 \times 10^{-3} \pm 1.54 \times 10^{-3}$ | $-0.092 \pm 0.040$ |      |     |
|                         | August | $4.25 \times 10^{-3} \pm 1.92 \times 10^{-3}$ | $-0.065 \pm 0.053$ |      |     |
| $\alpha$ -Pinene        | June   | $0.039 \pm 0.043$                             | $-0.149 \pm 0.107$ | 76.2 | 938 |
|                         | July   | $0.022 \pm 0.008$                             | $-0.084 \pm 0.027$ |      |     |
|                         | August | $0.024 \pm 0.008$                             | $-0.001 \pm 0.040$ |      |     |
| Camphene                | June   | $3.11 \times 10^{-3} \pm 3.16 \times 10^{-3}$ | $-0.009 \pm 0.104$ | 98.1 | 953 |
|                         | July   | $1.98 \times 10^{-3} \pm 8.50 \times 10^{-4}$ | $-0.074 \pm 0.033$ |      |     |
|                         | August | $1.94 \times 10^{-2} \pm 7.77 \times 10^{-3}$ | $0.012 \pm 0.046$  |      |     |
| $\beta$ -Pinene         | June   | $0.036 \pm 0.033$                             | $-0.131 \pm 0.058$ | 97.3 | 979 |
|                         | July   | $0.012 \pm 0.005$                             | $-0.068 \pm 0.032$ |      |     |
|                         | August | $0.012 \pm 0.004$                             | $-0.048 \pm 0.043$ |      |     |
| Myrcene                 | June   | $6.60 \times 10^{-3} \pm 3.91 \times 10^{-3}$ | $-0.060 \pm 0.058$ | 97.9 | 991 |
|                         | July   | $2.37 \times 10^{-3} \pm 5.77 \times 10^{-4}$ | $-0.003 \pm 0.019$ |      |     |
|                         | August | $1.90 \times 10^{-3} \pm 6.80 \times 10^{-4}$ | $-0.005 \pm 0.043$ |      |     |
| Sabinene                | June   | $0.031 \pm 0.033$                             | $-0.151 \pm 0.103$ | 97.5 | 975 |
|                         | July   | $0.005 \pm 0.003$                             | $-0.053 \pm 0.041$ |      |     |
|                         | August | $0.005 \pm 0.002$                             | $0.003 \pm 0.053$  |      |     |
| 6-Methyl-5-hepten-2-one | June   | $1.95 \times 10^{-3} \pm 1.32 \times 10^{-3}$ | $0.085 \pm 0.066$  | 90.1 | 987 |
|                         | July   | $1.54 \times 10^{-3} \pm 5.38 \times 10^{-4}$ | $0.047 \pm 0.027$  |      |     |
|                         | August | $4.68 \times 10^{-3} \pm 2.84 \times 10^{-3}$ | $0.103 \pm 0.073$  |      |     |

| Compound               | Month  | $E_s$                                         | $\beta$            | MF   | RI   |
|------------------------|--------|-----------------------------------------------|--------------------|------|------|
| $\alpha$ -Phellandrene | June   | $5.65 \times 10^{-3} \pm 3.19 \times 10^{-3}$ | $-0.068 \pm 0.058$ | 97.1 | 1006 |
|                        | July   | $1.41 \times 10^{-3} \pm 7.38 \times 10^{-4}$ | $0.050 \pm 0.040$  |      |      |
|                        | August | $2.98 \times 10^{-3} \pm 1.85 \times 10^{-3}$ | $-0.005 \pm 0.073$ |      |      |
| $\alpha$ -Terpinene    | June   | $5.51 \times 10^{-4} \pm 3.67 \times 10^{-4}$ | $-0.057 \pm 0.065$ | 97.6 | 1018 |
|                        | July   | $5.09 \times 10^{-4} \pm 2.00 \times 10^{-4}$ | $0.022 \pm 0.030$  |      |      |
|                        | August | $5.46 \times 10^{-4} \pm 1.35 \times 10^{-4}$ | $0.022 \pm 0.029$  |      |      |
| p-Cymene               | June   | $5.52 \times 10^{-3} \pm 2.45 \times 10^{-3}$ | $-0.020 \pm 0.043$ | 98.7 | 1025 |
|                        | July   | $4.12 \times 10^{-3} \pm 1.39 \times 10^{-3}$ | $0.000 \pm 0.026$  |      |      |
|                        | August | $6.62 \times 10^{-3} \pm 1.35 \times 10^{-3}$ | $-0.038 \pm 0.024$ |      |      |
| Limonene               | June   | $0.159 \pm 0.109$                             | $-0.005 \pm 0.067$ | 92.8 | 1033 |
|                        | July   | $0.077 \pm 0.038$                             | $-0.059 \pm 0.038$ |      |      |
|                        | August | $0.043 \pm 0.026$                             | $-0.092 \pm 0.071$ |      |      |
| $\gamma$ -Terpinene    | June   | $0.017 \pm 0.014$                             | $-0.121 \pm 0.077$ | 98.2 | 1061 |
|                        | July   | $0.007 \pm 0.003$                             | $-0.030 \pm 0.030$ |      |      |
|                        | August | $0.025 \pm 0.008$                             | $-0.043 \pm 0.038$ |      |      |
| Unknown Monoterpene    | June   | $9.21 \times 10^{-4} \pm 4.55 \times 10^{-4}$ | $-0.130 \pm 0.047$ | -    | 1060 |
|                        | July   | $1.65 \times 10^{-4} \pm 7.30 \times 10^{-5}$ | $-0.018 \pm 0.033$ |      |      |
|                        | August | $6.56 \times 10^{-5} \pm 4.43 \times 10^{-5}$ | $-0.125 \pm 0.075$ |      |      |

| Compound                             | Month  | $E_s$                                         | $\beta$            | MF   | RI   |
|--------------------------------------|--------|-----------------------------------------------|--------------------|------|------|
| Benzene,1-methyl-4-(1-methylethenyl) | June   | $8.99 \times 10^{-3} \pm 3.30 \times 10^{-3}$ | $-0.003 \pm 0.036$ | 95.9 | 1090 |
|                                      | July   | $5.25 \times 10^{-3} \pm 1.84 \times 10^{-3}$ | $0.026 \pm 0.027$  |      |      |
|                                      | August | $5.85 \times 10^{-3} \pm 1.38 \times 10^{-3}$ | $-0.061 \pm 0.027$ |      |      |
| 1,8-Cineole                          | June   | $2.53 \times 10^{-3} \pm 1.48 \times 10^{-3}$ | $-0.048 \pm 0.057$ | 85.0 | 1032 |
|                                      | July   | $1.56 \times 10^{-3} \pm 5.40 \times 10^{-4}$ | $-0.014 \pm 0.027$ |      |      |
|                                      | August | $2.37 \times 10^{-3} \pm 1.19 \times 10^{-3}$ | $0.031 \pm 0.058$  |      |      |
| Terpinolene                          | June   | $7.61 \times 10^{-3} \pm 4.63 \times 10^{-3}$ | $-0.126 \pm 0.060$ | 98.7 | 1086 |
|                                      | July   | $2.84 \times 10^{-3} \pm 7.14 \times 10^{-4}$ | $-0.037 \pm 0.020$ |      |      |
|                                      | August | $4.75 \times 10^{-3} \pm 1.10 \times 10^{-3}$ | $-0.075 \pm 0.027$ |      |      |
| Linalool                             | June   | $1.49 \times 10^{-3} \pm 2.13 \times 10^{-3}$ | $-0.103 \pm 0.142$ | -    | 1090 |
|                                      | July   | $6.68 \times 10^{-4} \pm 3.18 \times 10^{-4}$ | $0.057 \pm 0.037$  |      |      |
|                                      | August | $8.24 \times 10^{-4} \pm 5.57 \times 10^{-4}$ | $0.054 \pm 0.075$  |      |      |
| Isogeraniol                          | June   | $2.47 \times 10^{-3} \pm 3.56 \times 10^{-3}$ | $-0.048 \pm 0.141$ | 75.6 | 1131 |
|                                      | July   | $9.39 \times 10^{-4} \pm 7.26 \times 10^{-4}$ | $0.029 \pm 0.060$  |      |      |
|                                      | August | $4.33 \times 10^{-4} \pm 3.10 \times 10^{-4}$ | $0.035 \pm 0.085$  |      |      |
| (+) -Nopinone                        | June   | $2.34 \times 10^{-3} \pm 3.12 \times 10^{-3}$ | $0.008 \pm 0.132$  | 93.2 | 1140 |
|                                      | July   | $9.03 \times 10^{-4} \pm 6.68 \times 10^{-4}$ | $0.070 \pm 0.058$  |      |      |
|                                      | August | $4.40 \times 10^{-4} \pm 3.32 \times 10^{-4}$ | $-0.006 \pm 0.092$ |      |      |
| Camphor                              | June   | $4.18 \times 10^{-4} \pm 2.61 \times 10^{-4}$ | $-0.011 \pm 0.059$ | 81.6 | 1148 |
|                                      | July   | $9.22 \times 10^{-5} \pm 4.19 \times 10^{-5}$ | $-0.025 \pm 0.035$ |      |      |
|                                      | August | $8.28 \times 10^{-5} \pm 5.18 \times 10^{-5}$ | $-0.056 \pm 0.072$ |      |      |

| Compound          | Month  | $E_s$                                         | $\beta$            | MF   | RI   |
|-------------------|--------|-----------------------------------------------|--------------------|------|------|
| Sabina ketone     | June   | $2.33 \times 10^{-3} \pm 1.83 \times 10^{-3}$ | $0.013 \pm 0.077$  | 96.3 | 1160 |
|                   | July   | $7.58 \times 10^{-4} \pm 4.07 \times 10^{-4}$ | $0.039 \pm 0.042$  |      |      |
|                   | August | $1.11 \times 10^{-3} \pm 6.45 \times 10^{-4}$ | $0.075 \pm 0.067$  |      |      |
| Terpinen-4-ol     | June   | $1.38 \times 10^{-2} \pm 1.58 \times 10^{-2}$ | $-0.041 \pm 0.110$ | 96.4 | 1181 |
|                   | July   | $9.28 \times 10^{-3} \pm 5.27 \times 10^{-3}$ | $0.054 \pm 0.044$  |      |      |
|                   | August | $8.24 \times 10^{-3} \pm 2.79 \times 10^{-3}$ | $-0.024 \pm 0.038$ |      |      |
| Verbenone         | June   | $4.44 \times 10^{-4} \pm 3.58 \times 10^{-4}$ | $0.176 \pm 0.079$  | 86.2 | 1229 |
|                   | July   | $4.04 \times 10^{-4} \pm 2.12 \times 10^{-4}$ | $0.003 \pm 0.043$  |      |      |
|                   | August | $2.45 \times 10^{-4} \pm 1.36 \times 10^{-4}$ | $-0.033 \pm 0.071$ |      |      |
| Carvone           | June   | $4.25 \times 10^{-4} \pm 2.84 \times 10^{-4}$ | $-0.077 \pm 0.062$ | 76.4 | 1244 |
|                   | July   | $1.41 \times 10^{-4} \pm 4.59 \times 10^{-5}$ | $0.096 \pm 0.025$  |      |      |
|                   | August | $5.59 \times 10^{-5} \pm 2.08 \times 10^{-5}$ | $-0.036 \pm 0.048$ |      |      |
| $\alpha$ -Copaene | June   | $2.43 \times 10^{-4} \pm 1.68 \times 10^{-4}$ | $0.083 \pm 0.064$  | 80.0 | 1373 |
|                   | July   | $8.92 \times 10^{-5} \pm 4.31 \times 10^{-5}$ | $0.136 \pm 0.037$  |      |      |
|                   | August | $3.23 \times 10^{-5} \pm 1.51 \times 10^{-5}$ | $0.098 \pm 0.054$  |      |      |
| Isoledene         | June   | $1.49 \times 10^{-5} \pm 9.25 \times 10^{-6}$ | $0.133 \pm 0.058$  | 76.0 | 1436 |
|                   | July   | $1.68 \times 10^{-5} \pm 9.45 \times 10^{-6}$ | $0.074 \pm 0.044$  |      |      |
|                   | August | $2.54 \times 10^{-6} \pm 1.68 \times 10^{-6}$ | $0.089 \pm 0.067$  |      |      |

| <b>Compound</b>   | <b>Month</b> | <b>E<sub>s</sub></b>                             | <b>β</b>    | <b>MF</b> | <b>RI</b> |
|-------------------|--------------|--------------------------------------------------|-------------|-----------|-----------|
| Alloaromadendrene | June         | 2.42 x 10 <sup>-5</sup> ±2.14 x 10 <sup>-5</sup> | 0.296±0.084 | 93.9      | 1456      |
|                   | July         | 5.32 x 10 <sup>-5</sup> ±2.56 x 10 <sup>-5</sup> | 0.122±0.037 |           |           |
|                   | August       | 3.43 x 10 <sup>-6</sup> ±1.99 x 10 <sup>-6</sup> | 0.051±0.067 |           |           |
| Ledene            | June         | 3.59 x 10 <sup>-5</sup> ±2.81 x 10 <sup>-5</sup> | 0.224±0.071 | 87.8      | 1487      |
|                   | July         | 6.66 x 10 <sup>-5</sup> ±4.13 x 10 <sup>-5</sup> | 0.076±0.049 |           |           |
|                   | August       | 1.02 x 10 <sup>-5</sup> ±5.36 x 10 <sup>-6</sup> | 0.026±0.064 |           |           |
| α-Selinene        | June         | 2.79 x 10 <sup>-5</sup> ±2.63 x 10 <sup>-5</sup> | 0.224±0.089 | 93.3      | 1491      |
|                   | July         | 1.33 x 10 <sup>-5</sup> ±9.60 x 10 <sup>-6</sup> | 0.180±0.056 |           |           |
|                   | August       | 1.18 x 10 <sup>-6</sup> ±5.06 x 10 <sup>-7</sup> | 0.081±0.053 |           |           |
| α-Amorphene       | June         | 9.06 x 10 <sup>-5</sup> ±8.00 x 10 <sup>-5</sup> | 0.018±0.083 | 72.0      | 1508      |
|                   | July         | 1.84 x 10 <sup>-5</sup> ±8.67 x 10 <sup>-6</sup> | 0.122±0.037 |           |           |
|                   | August       | 1.25 x 10 <sup>-6</sup> ±2.22 x 10 <sup>-6</sup> | 0.350±0.194 |           |           |
| δ-Cadinene        | June         | 1.33 x 10 <sup>-4</sup> ±1.24 x 10 <sup>-4</sup> | 0.052±0.088 | 84.5      | 1515      |
|                   | July         | 4.21 x 10 <sup>-5</sup> ±2.00 x 10 <sup>-5</sup> | 0.094±0.037 |           |           |
|                   | August       | 1.37 x 10 <sup>-5</sup> ±6.92 x 10 <sup>-6</sup> | 0.005±0.059 |           |           |
| α-Calacorene      | June         | 6.92 x 10 <sup>-5</sup> ±5.11 x 10 <sup>-5</sup> | 0.029±0.068 | 80.8      | 1537      |
|                   | July         | 1.58 x 10 <sup>-5</sup> ±7.35 x 10 <sup>-6</sup> | 0.168±0.036 |           |           |
|                   | August       | 4.27 x 10 <sup>-6</sup> ±2.91 x 10 <sup>-6</sup> | 0.123±0.085 |           |           |

**Supplementary Table 2.** Standard emission factor  $E_s$  ( $\mu\text{g C g}^{-1} \text{h}^{-1}$ ) with 95 % confidence interval and empirical temperature coefficient  $\beta$  ( $^{\circ}\text{C}^{-1}$ ) with 95 % confidence interval, match factor (MF) and retention index (RI) of all emitted terpenoid compounds for *C. ladanifer* (n = 9 for June, n = 16 for July and August).  $E_s$  and  $\beta$  were calculated according to Guenther et al. (1993), where  $E_s$  is the y-intercept and  $\beta$  the slope of the regression.

| Compound          | Month  | $E_s$                                         | $\beta$           | MF   | RI  |
|-------------------|--------|-----------------------------------------------|-------------------|------|-----|
| Tricyclene        | June   | $1.23 \times 10^{-2} \pm 4.05 \times 10^{-3}$ | $0.047 \pm 0.032$ | 98.8 | 926 |
|                   | July   | $5.57 \times 10^{-3} \pm 1.34 \times 10^{-3}$ | $0.087 \pm 0.020$ |      |     |
|                   | August | $2.46 \times 10^{-3} \pm 9.06 \times 10^{-4}$ | $0.064 \pm 0.043$ |      |     |
| $\alpha$ -Thujene | June   | $7.27 \times 10^{-3} \pm 7.53 \times 10^{-3}$ | $0.055 \pm 0.100$ | 96.6 | 932 |
|                   | July   | $4.50 \times 10^{-3} \pm 1.48 \times 10^{-3}$ | $0.129 \pm 0.028$ |      |     |
|                   | August | $1.56 \times 10^{-3} \pm 8.38 \times 10^{-4}$ | $0.144 \pm 0.063$ |      |     |
| $\alpha$ -Pinene  | June   | $0.150 \pm 0.041$                             | $0.043 \pm 0.026$ | 76.2 | 938 |
|                   | July   | $0.125 \pm 0.032$                             | $0.074 \pm 0.022$ |      |     |
|                   | August | $0.051 \pm 0.017$                             | $0.057 \pm 0.040$ |      |     |



| <b>Compound</b>         | <b>Month</b> | <b>E<sub>s</sub></b>                             | <b>β</b>     | <b>MF</b> | <b>RI</b> |
|-------------------------|--------------|--------------------------------------------------|--------------|-----------|-----------|
| Camphene                | June         | 0.050±0.016                                      | 0.030±0.031  | 97.5      | 955       |
|                         | July         | 0.028±0.007                                      | 0.093±0.021  |           |           |
|                         | August       | 0.012±0.004                                      | 0.074±0.036  |           |           |
| Sabinene                | June         | 1.51 x 10 <sup>-2</sup> ±7.26 x 10 <sup>-3</sup> | 0.070±0.046  | 97.5      | 975       |
|                         | July         | 7.76 x 10 <sup>-3</sup> ±2.95 x 10 <sup>-3</sup> | 0.103±0.032  |           |           |
|                         | August       | 2.57 x 10 <sup>-3</sup> ±1.52 x 10 <sup>-3</sup> | 0.121±0.069  |           |           |
| β-Pinene                | June         | 3.37 x 10 <sup>-3</sup> ±1.92 x 10 <sup>-3</sup> | 0.084±0.055  | 97.3      | 979       |
|                         | July         | 2.67 x 10 <sup>-3</sup> ±1.06 x 10 <sup>-3</sup> | 0.103±0.033  |           |           |
|                         | August       | 2.26 x 10 <sup>-3</sup> ±9.66 x 10 <sup>-4</sup> | 0.023±0.050  |           |           |
| 6-Methyl-5-hepten-2-one | June         | 4.11 x 10 <sup>-3</sup> ±2.01 x 10 <sup>-3</sup> | 0.109±0.047  | 90.1      | 987       |
|                         | July         | 7.03 x 10 <sup>-4</sup> ±2.10 x 10 <sup>-4</sup> | 0.064±0.025  |           |           |
|                         | August       | 1.42 x 10 <sup>-3</sup> ±1.05 x 10 <sup>-3</sup> | -0.039±0.087 |           |           |
| Myrcene                 | June         | 0.023±0.019                                      | 0.071±0.080  | 91.9      | 991       |
|                         | July         | 0.009±0.003                                      | 0.124±0.023  |           |           |
|                         | August       | 0.045±0.017                                      | 0.014±0.043  |           |           |
| δ-3-Carene              | June         | 1.81 x 10 <sup>-2</sup> ±1.26 x 10 <sup>-2</sup> | 0.038±0.065  | 92.6      | 1007      |
|                         | July         | 8.43 x 10 <sup>-3</sup> ±2.14 x 10 <sup>-3</sup> | 0.111±0.021  |           |           |
|                         | August       | 3.64 x 10 <sup>-3</sup> ±1.94 x 10 <sup>-3</sup> | 0.119±0.063  |           |           |

| Compound                      | Month  | $E_s$                                         | $\beta$     | MF   | RI   |
|-------------------------------|--------|-----------------------------------------------|-------------|------|------|
| $\alpha$ -Terpinene           | June   | 0.047±0.044                                   | 0.039±0.090 | 97.6 | 1018 |
|                               | July   | 0.029±0.008                                   | 0.093±0.022 |      |      |
|                               | August | 0.015±0.004                                   | 0.140±0.034 |      |      |
| p-Cymene                      | June   | $1.69 \times 10^{-2} \pm 7.70 \times 10^{-3}$ | 0.020±0.044 | 82.6 | 1027 |
|                               | July   | $9.47 \times 10^{-3} \pm 1.73 \times 10^{-3}$ | 0.086±0.015 |      |      |
|                               | August | $6.01 \times 10^{-3} \pm 1.46 \times 10^{-3}$ | 0.112±0.029 |      |      |
| Limonene                      | June   | 0.033±0.021                                   | 0.082±0.061 | 92.8 | 1033 |
|                               | July   | 0.045±0.010                                   | 0.086±0.019 |      |      |
|                               | August | 0.024±0.008                                   | 0.074±0.041 |      |      |
| 1,8-Cineole                   | June   | $8.35 \times 10^{-3} \pm 4.35 \times 10^{-3}$ | 0.043±0.050 | 86.8 | 1034 |
|                               | July   | $4.63 \times 10^{-3} \pm 1.30 \times 10^{-3}$ | 0.076±0.024 |      |      |
|                               | August | $6.39 \times 10^{-3} \pm 4.71 \times 10^{-3}$ | 0.007±0.087 |      |      |
| 2,2,6-Trimethyl-cyclohexanone | June   | 0.027±0.007                                   | 0.000±0.025 | 94.0 | 1037 |
|                               | July   | 0.015±0.003                                   | 0.068±0.016 |      |      |
|                               | August | 0.010±0.003                                   | 0.105±0.038 |      |      |
| Trans- $\beta$ -Ocimene       | June   | $6.76 \times 10^{-3} \pm 2.43 \times 10^{-3}$ | 0.002±0.035 | 77.4 | 1048 |
|                               | July   | $6.75 \times 10^{-3} \pm 2.56 \times 10^{-3}$ | 0.051±0.032 |      |      |
|                               | August | $6.05 \times 10^{-3} \pm 3.59 \times 10^{-3}$ | 0.059±0.070 |      |      |

| Compound                           | Month  | $E_s$                                         | $\beta$      | MF   | RI   |
|------------------------------------|--------|-----------------------------------------------|--------------|------|------|
| 2,6-Dimethyl-5-hepten-1-ol         | June   | 0.049±0.021                                   | 0.032±0.043  | 81.0 | 1054 |
|                                    | July   | 0.032±0.009                                   | 0.058±0.024  |      |      |
|                                    | August | 0.018±0.007                                   | 0.125±0.048  |      |      |
| $\beta$ -Ocimene                   | June   | $7.11 \times 10^{-3} \pm 3.49 \times 10^{-3}$ | 0.068±0.047  | -    | 1055 |
|                                    | July   | $3.39 \times 10^{-3} \pm 1.40 \times 10^{-3}$ | 0.121±0.035  |      |      |
|                                    | August | $1.59 \times 10^{-3} \pm 7.62 \times 10^{-3}$ | 0.121±0.056  |      |      |
| $\gamma$ -Terpinene                | June   | 0.208±0.129                                   | 0.053±0.060  | 94.7 | 1061 |
|                                    | July   | 0.135±0.032                                   | 0.096±0.020  |      |      |
|                                    | August | 0.068±0.028                                   | 0.121±0.047  |      |      |
| Safranal                           | June   | $1.57 \times 10^{-3} \pm 5.53 \times 10^{-4}$ | -0.036±0.034 | 70.1 | 1072 |
|                                    | July   | $5.43 \times 10^{-4} \pm 2.08 \times 10^{-4}$ | 0.074±0.032  |      |      |
|                                    | August | $9.14 \times 10^{-4} \pm 2.25 \times 10^{-4}$ | 0.106±0.029  |      |      |
| 3,3,4-Trimethyl-2-cyclohexen-1-one | June   | $1.81 \times 10^{-3} \pm 8.72 \times 10^{-4}$ | 0.015±0.047  | 80.2 | 1080 |
|                                    | July   | $7.09 \times 10^{-4} \pm 1.71 \times 10^{-4}$ | 0.074±0.020  |      |      |
|                                    | August | $1.34 \times 10^{-4} \pm 4.30 \times 10^{-5}$ | 0.130±0.038  |      |      |
| 2-Norbornanone                     | June   | $2.25 \times 10^{-3} \pm 9.32 \times 10^{-4}$ | -0.048±0.040 | 84.5 | 1085 |
|                                    | July   | $8.22 \times 10^{-4} \pm 3.10 \times 10^{-4}$ | 0.081±0.032  |      |      |
|                                    | August | $5.19 \times 10^{-5} \pm 3.44 \times 10^{-5}$ | 0.073±0.072  |      |      |
| 2-Nonanone                         | June   | $2.73 \times 10^{-3} \pm 1.23 \times 10^{-3}$ | -0.157±0.046 | 90.3 | 1093 |
|                                    | July   | $4.34 \times 10^{-4} \pm 3.10 \times 10^{-4}$ | -0.029±0.060 |      |      |
|                                    | August | $7.79 \times 10^{-4} \pm 2.86 \times 10^{-4}$ | 0.014±0.044  |      |      |

| Compound                               | Month  | $E_s$                                         | $\beta$           | MF   | RI   |
|----------------------------------------|--------|-----------------------------------------------|-------------------|------|------|
| Filifolone                             | June   | $1.08 \times 10^{-2} \pm 7.19 \times 10^{-3}$ | $0.030 \pm 0.064$ | 92.9 | 1102 |
|                                        | July   | $5.27 \times 10^{-3} \pm 1.25 \times 10^{-3}$ | $0.103 \pm 0.020$ |      |      |
|                                        | August | $2.78 \times 10^{-3} \pm 8.95 \times 10^{-3}$ | $0.151 \pm 0.038$ |      |      |
| Ethylene ketal of Hepta-2,5-dien-4-one | June   | $1.07 \times 10^{-2} \pm 4.26 \times 10^{-3}$ | $0.018 \pm 0.039$ | 84.8 | 1114 |
|                                        | July   | $3.46 \times 10^{-3} \pm 1.28 \times 10^{-3}$ | $0.106 \pm 0.031$ |      |      |
|                                        | August | $2.49 \times 10^{-3} \pm 1.09 \times 10^{-3}$ | $0.050 \pm 0.051$ |      |      |
| Phenylethyl alcohol                    | June   | $4.31 \times 10^{-3} \pm 2.36 \times 10^{-3}$ | $0.047 \pm 0.053$ | 90.8 | 1127 |
|                                        | July   | $9.37 \times 10^{-4} \pm 1.72 \times 10^{-4}$ | $0.156 \pm 0.016$ |      |      |
|                                        | August | $9.47 \times 10^{-4} \pm 3.93 \times 10^{-4}$ | $0.093 \pm 0.049$ |      |      |
| 2(10)-Pinen-3-ol                       | June   | $2.19 \times 10^{-2} \pm 4.78 \times 10^{-3}$ | $0.092 \pm 0.021$ | 82.0 | 1145 |
|                                        | July   | $1.01 \times 10^{-2} \pm 2.14 \times 10^{-3}$ | $0.159 \pm 0.018$ |      |      |
|                                        | August | $3.50 \times 10^{-3} \pm 1.25 \times 10^{-3}$ | $0.197 \pm 0.042$ |      |      |
| Pinocarveol                            | June   | $2.46 \times 10^{-2} \pm 7.05 \times 10^{-3}$ | $0.078 \pm 0.028$ | 86.0 | 1153 |
|                                        | July   | $1.01 \times 10^{-2} \pm 2.16 \times 10^{-3}$ | $0.159 \pm 0.018$ |      |      |
|                                        | August | $1.22 \times 10^{-4} \pm 5.04 \times 10^{-5}$ | $0.063 \pm 0.048$ |      |      |
| Camphor                                | June   | $3.11 \times 10^{-3} \pm 1.22 \times 10^{-3}$ | $0.099 \pm 0.038$ | 95.0 | 1159 |
|                                        | July   | $5.61 \times 10^{-4} \pm 4.46 \times 10^{-4}$ | $0.167 \pm 0.053$ |      |      |
|                                        | August | $4.87 \times 10^{-4} \pm 1.67 \times 10^{-4}$ | $0.196 \pm 0.040$ |      |      |

| Compound                  | Month  | $E_s$                                         | $\beta$            | MF   | RI   |
|---------------------------|--------|-----------------------------------------------|--------------------|------|------|
| Pinocarvone               | June   | $2.62 \times 10^{-2} \pm 7.19 \times 10^{-3}$ | $0.084 \pm 0.026$  | 77.5 | 1171 |
|                           | July   | $5.00 \times 10^{-4} \pm 3.14 \times 10^{-4}$ | $0.178 \pm 0.052$  |      |      |
|                           | August | $1.93 \times 10^{-4} \pm 8.51 \times 10^{-5}$ | $0.239 \pm 0.054$  |      |      |
| Borneol                   | June   | $1.13 \times 10^{-3} \pm 7.14 \times 10^{-4}$ | $0.032 \pm 0.061$  | -    | 1185 |
|                           | July   | $6.42 \times 10^{-4} \pm 1.41 \times 10^{-4}$ | $0.141 \pm 0.019$  |      |      |
|                           | August | $1.80 \times 10^{-4} \pm 5.37 \times 10^{-5}$ | $0.179 \pm 0.035$  |      |      |
| Terpinene-4-ol            | June   | $5.86 \times 10^{-3} \pm 2.02 \times 10^{-3}$ | $0.107 \pm 0.033$  | 95.7 | 1188 |
|                           | July   | $3.80 \times 10^{-5} \pm 3.93 \times 10^{-5}$ | $0.126 \pm 0.084$  |      |      |
|                           | August | $2.65 \times 10^{-5} \pm 1.56 \times 10^{-5}$ | $-0.006 \pm 0.061$ |      |      |
| 1-Methylphenyl-ethanone   | June   | $8.31 \times 10^{-4} \pm 7.02 \times 10^{-4}$ | $0.119 \pm 0.082$  | 90.5 | 1190 |
|                           | July   | $2.18 \times 10^{-4} \pm 9.93 \times 10^{-5}$ | $0.189 \pm 0.038$  |      |      |
|                           | August | $1.36 \times 10^{-4} \pm 6.82 \times 10^{-5}$ | $0.137 \pm 0.054$  |      |      |
| Myrtenal                  | June   | $1.12 \times 10^{-2} \pm 3.70 \times 10^{-3}$ | $0.091 \pm 0.032$  | 89.0 | 1199 |
|                           | July   | $4.79 \times 10^{-3} \pm 1.13 \times 10^{-3}$ | $0.154 \pm 0.020$  |      |      |
|                           | August | $5.65 \times 10^{-4} \pm 5.17 \times 10^{-4}$ | $0.249 \pm 0.107$  |      |      |
| Myrtenol                  | June   | $1.09 \times 10^{-2} \pm 5.88 \times 10^{-3}$ | $0.106 \pm 0.052$  | 92.1 | 1209 |
|                           | July   | $2.54 \times 10^{-3} \pm 7.45 \times 10^{-4}$ | $0.112 \pm 0.025$  |      |      |
|                           | August | $9.10 \times 10^{-4} \pm 2.41 \times 10^{-4}$ | $0.144 \pm 0.031$  |      |      |
| $\alpha$ -Fenchyl acetate | June   | $1.02 \times 10^{-2} \pm 5.88 \times 10^{-3}$ | $0.077 \pm 0.037$  | 94.3 | 1218 |
|                           | July   | $2.53 \times 10^{-4} \pm 6.89 \times 10^{-5}$ | $0.186 \pm 0.024$  |      |      |
|                           | August | $1.17 \times 10^{-4} \pm 3.55 \times 10^{-5}$ | $0.139 \pm 0.035$  |      |      |

| Compound                           | Month  | $E_s$                                         | $\beta$           | MF   | RI   |
|------------------------------------|--------|-----------------------------------------------|-------------------|------|------|
| Verbenone                          | June   | $1.84 \times 10^{-2} \pm 6.97 \times 10^{-3}$ | $0.105 \pm 0.037$ | 73.9 | 1222 |
|                                    | July   | $5.64 \times 10^{-3} \pm 1.62 \times 10^{-3}$ | $0.115 \pm 0.024$ |      |      |
|                                    | August | $8.77 \times 10^{-6} \pm 2.82 \times 10^{-5}$ | $0.361 \pm 0.392$ |      |      |
| Trans-Carveol                      | June   | $1.41 \times 10^{-2} \pm 5.57 \times 10^{-3}$ | $0.087 \pm 0.038$ | 89.6 | 1235 |
|                                    | July   | $1.75 \times 10^{-4} \pm 9.94 \times 10^{-5}$ | $0.291 \pm 0.050$ |      |      |
|                                    | August | $1.34 \times 10^{-5} \pm 1.16 \times 10^{-5}$ | $0.482 \pm 0.107$ |      |      |
| l-Carvone                          | June   | $2.00 \times 10^{-3} \pm 2.13 \times 10^{-3}$ | $0.131 \pm 0.103$ | 95.0 | 1252 |
|                                    | July   | $4.48 \times 10^{-4} \pm 6.88 \times 10^{-5}$ | $0.113 \pm 0.013$ |      |      |
|                                    | August | $3.08 \times 10^{-4} \pm 1.30 \times 10^{-4}$ | $0.190 \pm 0.050$ |      |      |
| Piperitone                         | June   | $8.37 \times 10^{-4} \pm 9.13 \times 10^{-4}$ | $0.015 \pm 0.105$ | 90.5 | 1262 |
|                                    | July   | $1.06 \times 10^{-4} \pm 4.89 \times 10^{-5}$ | $0.107 \pm 0.039$ |      |      |
|                                    | August | $1.36 \times 10^{-4} \pm 5.54 \times 10^{-5}$ | $0.170 \pm 0.048$ |      |      |
| Isopiperitenone                    | June   | $2.62 \times 10^{-3} \pm 2.05 \times 10^{-3}$ | $0.174 \pm 0.075$ | 89.9 | 1282 |
|                                    | July   | $5.78 \times 10^{-3} \pm 1.56 \times 10^{-3}$ | $0.123 \pm 0.023$ |      |      |
|                                    | August | $1.68 \times 10^{-3} \pm 5.06 \times 10^{-4}$ | $0.193 \pm 0.035$ |      |      |
| Benzenepropanoic acid methyl ester | June   | $2.11 \times 10^{-3} \pm 3.37 \times 10^{-4}$ | $0.011 \pm 0.015$ | 93.3 | 1285 |
|                                    | July   | $7.45 \times 10^{-4} \pm 1.36 \times 10^{-4}$ | $0.068 \pm 0.015$ |      |      |
|                                    | August | $3.06 \times 10^{-4} \pm 1.56 \times 10^{-4}$ | $0.147 \pm 0.060$ |      |      |

| Compound                           | Month  | $E_s$                                         | $\beta$           | MF   | RI   |
|------------------------------------|--------|-----------------------------------------------|-------------------|------|------|
| Unknown Sesquiterpene I            | June   | $1.15 \times 10^{-2} \pm 1.24 \times 10^{-2}$ | $0.055 \pm 0.104$ | 90.5 | 1293 |
|                                    | July   | $1.00 \times 10^{-2} \pm 4.44 \times 10^{-3}$ | $0.118 \pm 0.037$ |      |      |
|                                    | August | $5.77 \times 10^{-5} \pm 3.15 \times 10^{-5}$ | $0.232 \pm 0.064$ |      |      |
| Thymol                             | June   | $2.85 \times 10^{-3} \pm 8.92 \times 10^{-4}$ | $0.104 \pm 0.030$ | 81.6 | 1309 |
|                                    | July   | $8.95 \times 10^{-4} \pm 2.65 \times 10^{-4}$ | $0.185 \pm 0.025$ |      |      |
|                                    | August | $8.45 \times 10^{-4} \pm 2.66 \times 10^{-4}$ | $0.199 \pm 0.037$ |      |      |
| Myrtenyl acetate                   | June   | $4.81 \times 10^{-3} \pm 1.83 \times 10^{-3}$ | $0.105 \pm 0.037$ | 90.1 | 1328 |
|                                    | July   | $1.57 \times 10^{-3} \pm 3.62 \times 10^{-4}$ | $0.151 \pm 0.019$ |      |      |
|                                    | August | $5.85 \times 10^{-5} \pm 3.61 \times 10^{-5}$ | $0.270 \pm 0.072$ |      |      |
| Piperitenone                       | June   | $9.55 \times 10^{-4} \pm 5.95 \times 10^{-4}$ | $0.064 \pm 0.060$ | 85.4 | 1343 |
|                                    | July   | $3.68 \times 10^{-4} \pm 9.87 \times 10^{-5}$ | $0.125 \pm 0.023$ |      |      |
|                                    | August | $2.50 \times 10^{-4} \pm 8.31 \times 10^{-5}$ | $0.189 \pm 0.039$ |      |      |
| Carvyl Acetate                     | June   | $1.56 \times 10^{-3} \pm 5.70 \times 10^{-4}$ | $0.103 \pm 0.035$ | 95.3 | 1361 |
|                                    | July   | $3.55 \times 10^{-4} \pm 8.53 \times 10^{-5}$ | $0.175 \pm 0.020$ |      |      |
|                                    | August | $2.41 \times 10^{-4} \pm 8.61 \times 10^{-5}$ | $0.198 \pm 0.042$ |      |      |
| Cis-p-Mentha-6,8-dien-2-ol acetate | June   | $5.78 \times 10^{-3} \pm 1.72 \times 10^{-3}$ | $0.068 \pm 0.029$ | 84.2 | 1363 |
|                                    | July   | $2.40 \times 10^{-3} \pm 6.88 \times 10^{-4}$ | $0.120 \pm 0.024$ |      |      |
|                                    | August | $8.01 \times 10^{-4} \pm 3.01 \times 10^{-4}$ | $0.199 \pm 0.044$ |      |      |
| $\beta$ -Cubebene                  | June   | $1.11 \times 10^{-3} \pm 5.15 \times 10^{-4}$ | $0.152 \pm 0.045$ | 94.7 | 1388 |
|                                    | July   | $5.94 \times 10^{-4} \pm 1.58 \times 10^{-4}$ | $0.156 \pm 0.023$ |      |      |
|                                    | August | $1.04 \times 10^{-4} \pm 4.11 \times 10^{-5}$ | $0.209 \pm 0.046$ |      |      |

| Compound                  | Month  | $E_s$                                         | $\beta$           | MF   | RI   |
|---------------------------|--------|-----------------------------------------------|-------------------|------|------|
| Dihydro- $\alpha$ -Ionone | June   | $3.25 \times 10^{-4} \pm 2.78 \times 10^{-4}$ | 0.061 $\pm$ 0.078 | 83.2 | 1413 |
|                           | July   | $6.63 \times 10^{-4} \pm 4.00 \times 10^{-4}$ | 0.103 $\pm$ 0.051 |      |      |
|                           | August | $3.24 \times 10^{-4} \pm 2.77 \times 10^{-4}$ | 0.137 $\pm$ 0.100 |      |      |
| Trans-Caryophyllene       | June   | $2.20 \times 10^{-3} \pm 1.23 \times 10^{-3}$ | 0.066 $\pm$ 0.054 | 76.7 | 1418 |
|                           | July   | $6.64 \times 10^{-4} \pm 1.99 \times 10^{-4}$ | 0.179 $\pm$ 0.025 |      |      |
|                           | August | $2.90 \times 10^{-4} \pm 1.09 \times 10^{-4}$ | 0.195 $\pm$ 0.044 |      |      |
| Germacrene                | June   | $2.96 \times 10^{-4} \pm 1.17 \times 10^{-4}$ | 0.172 $\pm$ 0.038 | 86.8 | 1428 |
|                           | July   | $1.30 \times 10^{-4} \pm 5.33 \times 10^{-5}$ | 0.163 $\pm$ 0.035 |      |      |
|                           | August | $5.86 \times 10^{-5} \pm 3.46 \times 10^{-5}$ | 0.155 $\pm$ 0.069 |      |      |
| Unknown Sesquiterpene II  | June   | $5.65 \times 10^{-4} \pm 6.00 \times 10^{-4}$ | 0.272 $\pm$ 0.103 | 91.5 | 1439 |
|                           | July   | $3.90 \times 10^{-4} \pm 3.00 \times 10^{-4}$ | 0.222 $\pm$ 0.065 |      |      |
|                           | August | $2.22 \times 10^{-4} \pm 8.24 \times 10^{-5}$ | 0.224 $\pm$ 0.044 |      |      |
| $\beta$ -Chamigrene       | June   | $9.23 \times 10^{-5} \pm 1.15 \times 10^{-4}$ | 0.291 $\pm$ 0.120 | 74.4 | 1441 |
|                           | July   | $1.08 \times 10^{-4} \pm 8.86 \times 10^{-5}$ | 0.183 $\pm$ 0.072 |      |      |
|                           | August | $5.74 \times 10^{-5} \pm 3.21 \times 10^{-5}$ | 0.187 $\pm$ 0.066 |      |      |
| 6-Endo-Hydroxyborneol     | June   | $1.13 \times 10^{-3} \pm 3.85 \times 10^{-4}$ | 0.122 $\pm$ 0.033 | -    | 1443 |
|                           | July   | $3.82 \times 10^{-4} \pm 8.72 \times 10^{-5}$ | 0.168 $\pm$ 0.019 |      |      |
|                           | August | $2.05 \times 10^{-4} \pm 1.23 \times 10^{-4}$ | 0.224 $\pm$ 0.071 |      |      |



| Compound            | Month  | $E_s$                                         | $\beta$           | MF   | RI   |
|---------------------|--------|-----------------------------------------------|-------------------|------|------|
| $\alpha$ -Cubebene  | June   | $8.52 \times 10^{-4} \pm 6.26 \times 10^{-4}$ | $0.180 \pm 0.071$ | 86.2 | 1449 |
|                     | July   | $6.38 \times 10^{-4} \pm 2.62 \times 10^{-4}$ | $0.185 \pm 0.035$ |      |      |
|                     | August | $8.22 \times 10^{-4} \pm 5.29 \times 10^{-4}$ | $0.195 \pm 0.076$ |      |      |
| Alloaromadendrene   | June   | $2.92 \times 10^{-3} \pm 2.16 \times 10^{-3}$ | $0.278 \pm 0.072$ | 94.5 | 1462 |
|                     | July   | $1.84 \times 10^{-3} \pm 1.39 \times 10^{-3}$ | $0.212 \pm 0.064$ |      |      |
|                     | August | $1.19 \times 10^{-4} \pm 6.39 \times 10^{-5}$ | $0.198 \pm 0.063$ |      |      |
| $\alpha$ -Amorphene | June   | $2.34 \times 10^{-3} \pm 7.95 \times 10^{-4}$ | $0.162 \pm 0.033$ | 95.5 | 1475 |
|                     | July   | $1.27 \times 10^{-3} \pm 4.19 \times 10^{-4}$ | $0.142 \pm 0.028$ |      |      |
|                     | August | $3.84 \times 10^{-4} \pm 1.63 \times 10^{-4}$ | $0.220 \pm 0.050$ |      |      |
| Ledene              | June   | $7.28 \times 10^{-4} \pm 5.53 \times 10^{-4}$ | $0.205 \pm 0.073$ | 85.6 | 1493 |
|                     | July   | $2.43 \times 10^{-4} \pm 1.35 \times 10^{-4}$ | $0.203 \pm 0.047$ |      |      |
|                     | August | $5.91 \times 10^{-5} \pm 3.01 \times 10^{-5}$ | $0.199 \pm 0.060$ |      |      |
| $\gamma$ -Selinene  | June   | $6.79 \times 10^{-4} \pm 4.30 \times 10^{-4}$ | $0.131 \pm 0.061$ | 82.0 | 1496 |
|                     | July   | $2.43 \times 10^{-4} \pm 1.53 \times 10^{-4}$ | $0.145 \pm 0.053$ |      |      |
|                     | August | $5.07 \times 10^{-5} \pm 3.12 \times 10^{-5}$ | $0.225 \pm 0.072$ |      |      |
| $\alpha$ -Muurolene | June   | $9.84 \times 10^{-4} \pm 3.98 \times 10^{-4}$ | $0.184 \pm 0.039$ | 97.0 | 1498 |
|                     | July   | $5.30 \times 10^{-4} \pm 2.18 \times 10^{-4}$ | $0.161 \pm 0.035$ |      |      |
|                     | August | $1.78 \times 10^{-4} \pm 7.43 \times 10^{-5}$ | $0.237 \pm 0.049$ |      |      |
| $\alpha$ -Farnesene | June   | $1.27 \times 10^{-4} \pm 6.55 \times 10^{-5}$ | $0.223 \pm 0.050$ | 92.3 | 1507 |
|                     | July   | $1.42 \times 10^{-4} \pm 7.32 \times 10^{-5}$ | $0.178 \pm 0.044$ |      |      |
|                     | August | $5.53 \times 10^{-5} \pm 2.93 \times 10^{-5}$ | $0.233 \pm 0.066$ |      |      |

| Compound                  | Month  | $E_s$                                         | $\beta$     | MF   | RI   |
|---------------------------|--------|-----------------------------------------------|-------------|------|------|
| $\delta$ -Cadinene        | June   | $2.20 \times 10^{-3} \pm 1.19 \times 10^{-3}$ | 0.213±0.053 | 95.1 | 1519 |
|                           | July   | $1.43 \times 10^{-3} \pm 6.15 \times 10^{-4}$ | 0.179±0.036 |      |      |
|                           | August | $4.52 \times 10^{-4} \pm 2.00 \times 10^{-4}$ | 0.236±0.052 |      |      |
| Unknown Sesquiterpene III | June   | $1.01 \times 10^{-3} \pm 3.04 \times 10^{-4}$ | 0.107±0.029 | 94.4 | 1532 |
|                           | July   | $8.42 \times 10^{-4} \pm 3.79 \times 10^{-4}$ | 0.171±0.038 |      |      |
|                           | August | $4.33 \times 10^{-4} \pm 1.79 \times 10^{-4}$ | 0.196±0.048 |      |      |
| Cadina-1,2,4-diene        | June   | $9.16 \times 10^{-4} \pm 5.83 \times 10^{-4}$ | 0.165±0.061 | 93.2 | 1540 |
|                           | July   | $6.61 \times 10^{-4} \pm 2.47 \times 10^{-4}$ | 0.174±0.032 |      |      |
|                           | August | $2.3 \times 10^{-4} \pm 7.52 \times 10^{-5}$  | 0.222±0.037 |      |      |
| Palustrol                 | June   | $1.22 \times 10^{-3} \pm 6.15 \times 10^{-4}$ | 0.221±0.049 | 96.0 | 1568 |
|                           | July   | $4.36 \times 10^{-4} \pm 3.24 \times 10^{-4}$ | 0.217±0.065 |      |      |
|                           | August | $2.27 \times 10^{-5} \pm 7.40 \times 10^{-5}$ | 0.279±0.354 |      |      |
| Spathulenol               | June   | $3.90 \times 10^{-4} \pm 2.23 \times 10^{-4}$ | 0.234±0.055 | 88.4 | 1576 |
|                           | July   | $1.06 \times 10^{-4} \pm 8.64 \times 10^{-5}$ | 0.288±0.069 |      |      |
|                           | August | $1.08 \times 10^{-4} \pm 5.07 \times 10^{-5}$ | 0.231±0.055 |      |      |
| Aromadendran              | June   | $1.41 \times 10^{-4} \pm 3.70 \times 10^{-5}$ | 0.160±0.025 | 85.3 | 1579 |
|                           | July   | $5.65 \times 10^{-5} \pm 1.25 \times 10^{-5}$ | 0.164±0.019 |      |      |
|                           | August | $2.66 \times 10^{-5} \pm 6.97 \times 10^{-6}$ | 0.204±0.031 |      |      |

| Compound               | Month  | $E_s$                                         | $\beta$            | MF   | RI   |
|------------------------|--------|-----------------------------------------------|--------------------|------|------|
| Viridiflorol           | June   | $3.15 \times 10^{-3} \pm 2.76 \times 10^{-3}$ | $0.367 \pm 0.085$  | 93.1 | 1598 |
|                        | July   | $1.51 \times 10^{-3} \pm 4.97 \times 10^{-4}$ | $0.133 \pm 0.028$  |      |      |
|                        | August | $1.78 \times 10^{-3} \pm 6.16 \times 10^{-4}$ | $0.180 \pm 0.041$  |      |      |
| $\delta$ -Cadinol      | June   | $4.66 \times 10^{-3} \pm 2.37 \times 10^{-3}$ | $-0.005 \pm 0.049$ | 84.6 | 1665 |
|                        | July   | $1.10 \times 10^{-3} \pm 5.17 \times 10^{-4}$ | $0.133 \pm 0.040$  |      |      |
|                        | August | $9.85 \times 10^{-4} \pm 4.57 \times 10^{-4}$ | $0.169 \pm 0.055$  |      |      |
| Cadalene               | June   | $8.01 \times 10^{-4} \pm 3.30 \times 10^{-4}$ | $0.201 \pm 0.040$  | 93.1 | 1670 |
|                        | July   | $4.19 \times 10^{-4} \pm 1.58 \times 10^{-4}$ | $0.196 \pm 0.032$  |      |      |
|                        | August | $4.08 \times 10^{-4} \pm 1.37 \times 10^{-4}$ | $0.198 \pm 0.040$  |      |      |
| Benzyl benzoate        | June   | $7.44 \times 10^{-5} \pm 2.37 \times 10^{-5}$ | $0.195 \pm 0.031$  | 94.5 | 1768 |
|                        | July   | $5.86 \times 10^{-6} \pm 2.49 \times 10^{-6}$ | $0.294 \pm 0.038$  |      |      |
|                        | August | $7.49 \times 10^{-6} \pm 5.57 \times 10^{-6}$ | $0.379 \pm 0.087$  |      |      |
| 5- $\beta$ -Androstane | June   | $2.84 \times 10^{-5} \pm 3.89 \times 10^{-5}$ | $0.096 \pm 0.132$  | 80.1 | 1926 |
|                        | July   | $4.50 \times 10^{-5} \pm 1.5 \times 10^{-5}$  | $0.136 \pm 0.029$  |      |      |
|                        | August | $5.00 \times 10^{-5} \pm 1.76 \times 10^{-5}$ | $0.152 \pm 0.041$  |      |      |
| Manoyl oxide           | June   | $1.32 \times 10^{-5} \pm 7.46 \times 10^{-6}$ | $0.122 \pm 0.056$  | 92.1 | 1933 |
|                        | July   | $1.83 \times 10^{-5} \pm 4.25 \times 10^{-6}$ | $0.108 \pm 0.020$  |      |      |
|                        | August | $2.14 \times 10^{-5} \pm 8.25 \times 10^{-6}$ | $0.139 \pm 0.045$  |      |      |
| Ent-16-kaurene         | June   | $3.13 \times 10^{-6} \pm 4.60 \times 10^{-6}$ | $0.089 \pm 0.142$  | 96.3 | 1941 |
|                        | July   | $3.31 \times 10^{-6} \pm 8.33 \times 10^{-7}$ | $0.066 \pm 0.021$  |      |      |
|                        | August | $2.84 \times 10^{-6} \pm 1.16 \times 10^{-6}$ | $0.119 \pm 0.048$  |      |      |

| Compound                     | Month  | $E_s$                                         | $\beta$           | MF   | RI   |
|------------------------------|--------|-----------------------------------------------|-------------------|------|------|
| Verticillol                  | June   | $3.23 \times 10^{-6} \pm 3.03 \times 10^{-6}$ | $0.079 \pm 0.093$ | 75.1 | 1947 |
|                              | July   | $2.20 \times 10^{-5} \pm 5.49 \times 10^{-6}$ | $0.063 \pm 0.021$ |      |      |
|                              | August | $1.64 \times 10^{-5} \pm 7.69 \times 10^{-6}$ | $0.130 \pm 0.055$ |      |      |
| Cembrene                     | June   | $2.28 \times 10^{-5} \pm 1.80 \times 10^{-5}$ | $0.124 \pm 0.076$ | 81.5 | 1944 |
|                              | July   | $1.21 \times 10^{-5} \pm 4.40 \times 10^{-6}$ | $0.103 \pm 0.031$ |      |      |
|                              | August | $1.13 \times 10^{-5} \pm 7.17 \times 10^{-6}$ | $0.131 \pm 0.075$ |      |      |
| 5- $\alpha$ -Androstan-6-one | June   | $7.55 \times 10^{-7} \pm 1.06 \times 10^{-6}$ | $0.205 \pm 0.134$ | 73.2 | 1984 |
|                              | July   | $3.32 \times 10^{-6} \pm 9.45 \times 10^{-7}$ | $0.159 \pm 0.024$ |      |      |
|                              | August | $3.57 \times 10^{-6} \pm 1.17 \times 10^{-6}$ | $0.152 \pm 0.038$ |      |      |

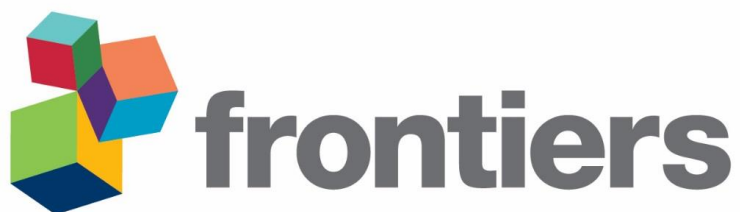

Supplement: Data_Sheet_1.pdf [file Data_Sheet_1.pdf]
